# Supplementary material
Source: MDPI journal article supplement (https://www.mdpi.com/2075-5309/14/4/1007)
Supplement: s1 [file s1]

Archive with 1 entries (1 files):
- buildings-2882150-supplementary.pdf
