# Supplementary material
Source: MDPI journal article supplement (https://www.mdpi.com/2075-5309/14/4/1007)
Supplement: s1 [file s1 › buildings-2882150-supplementary.pdf]

Current Appendix presents 2D drawings of the enclosed spaces and detailed views.

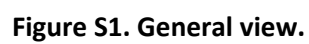

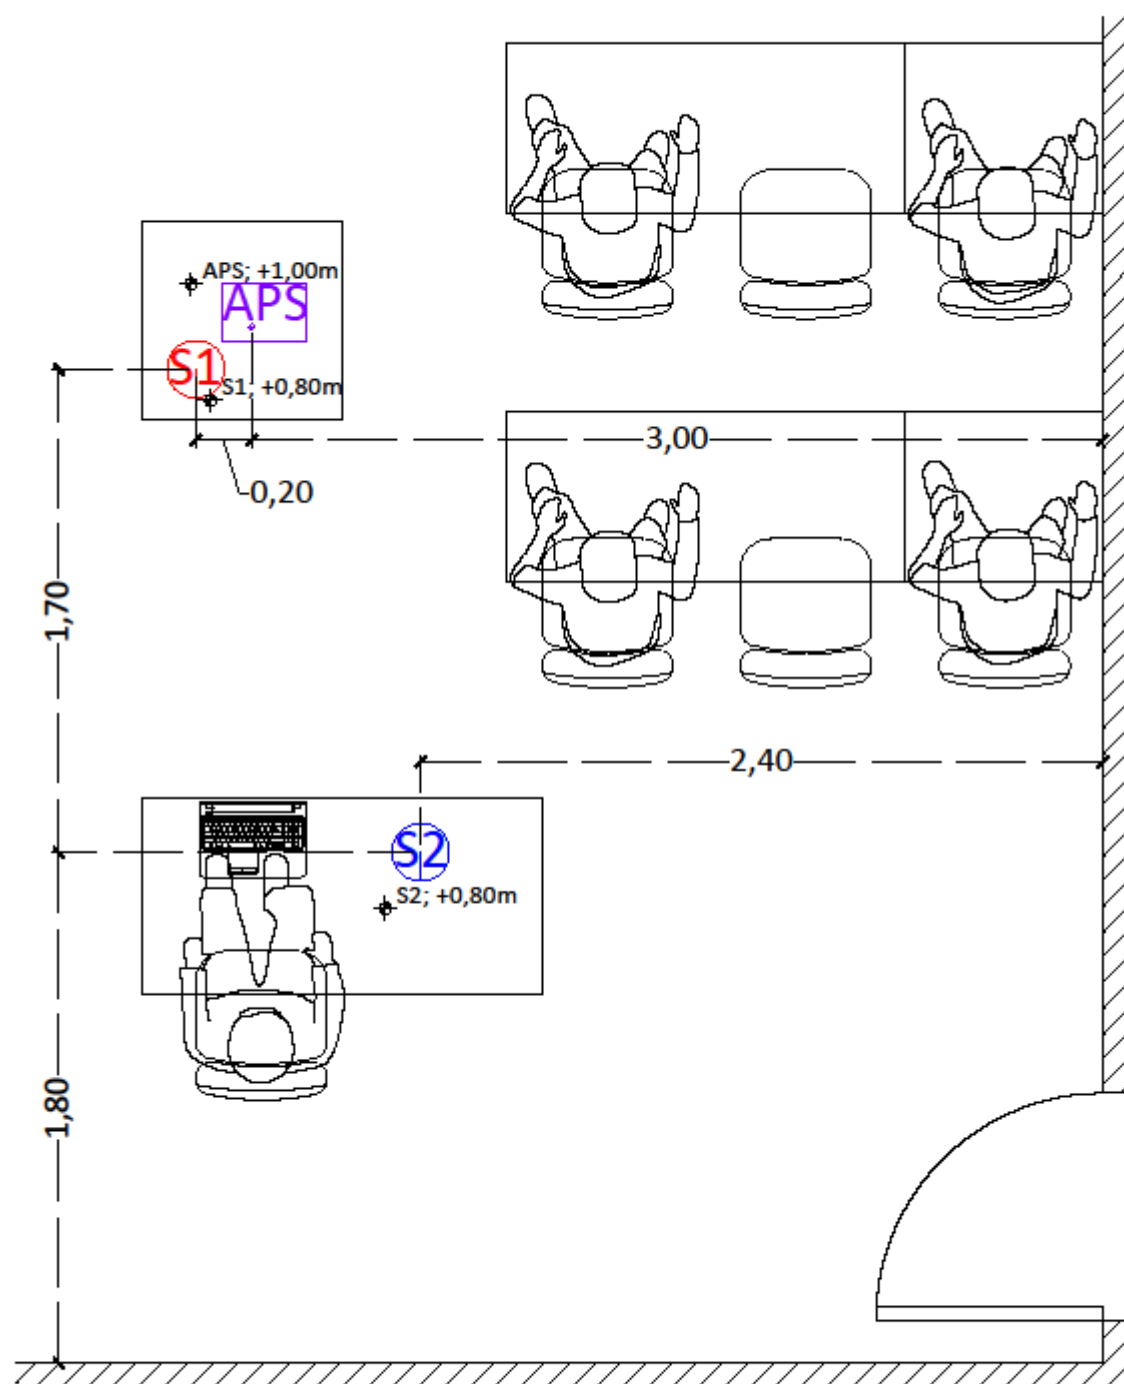

Figure S2. Detail view.

S1.2. University Classroom A206— Scenario 2: Empty class with one people partial stay.

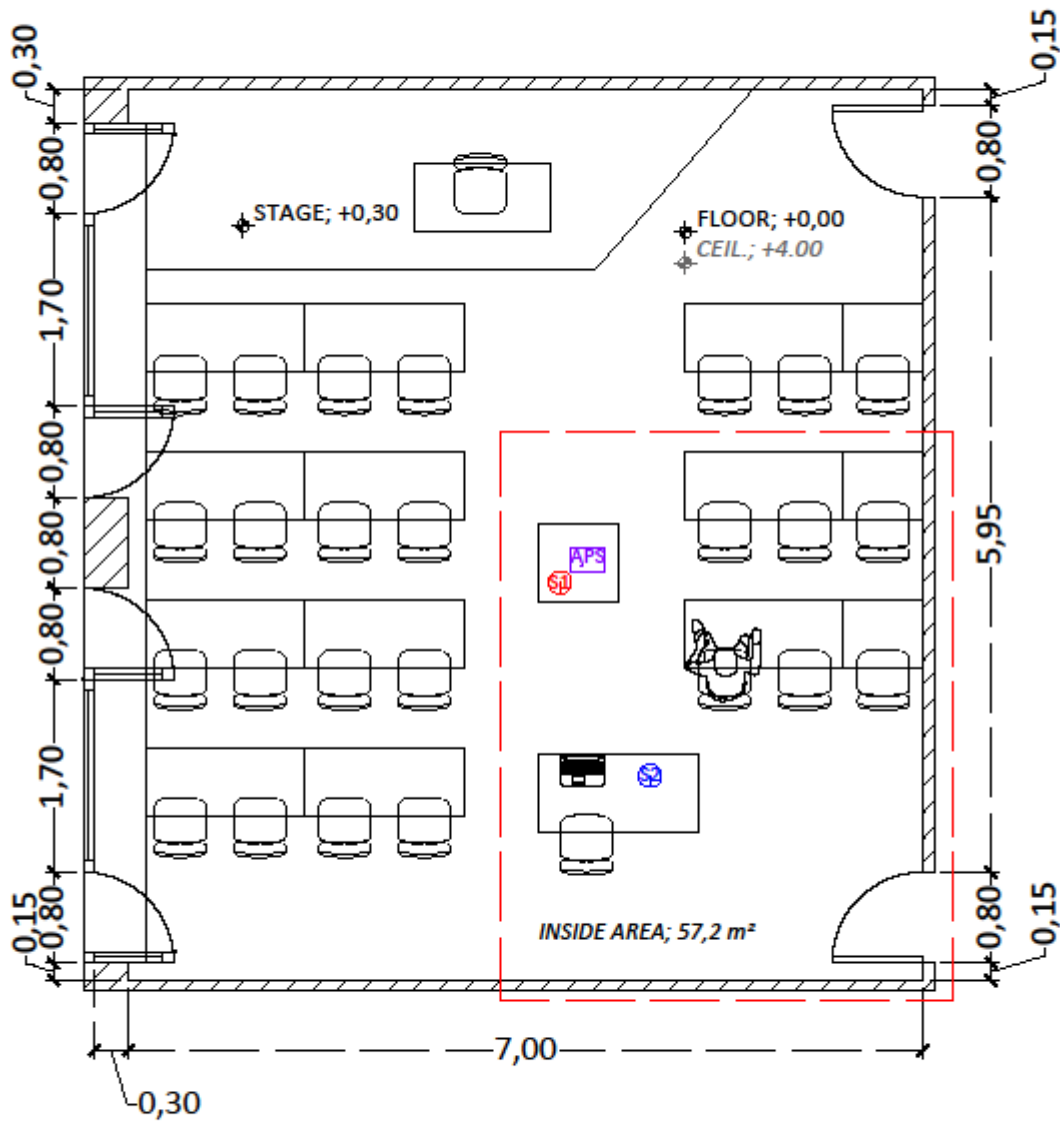

Figure S3. General view.

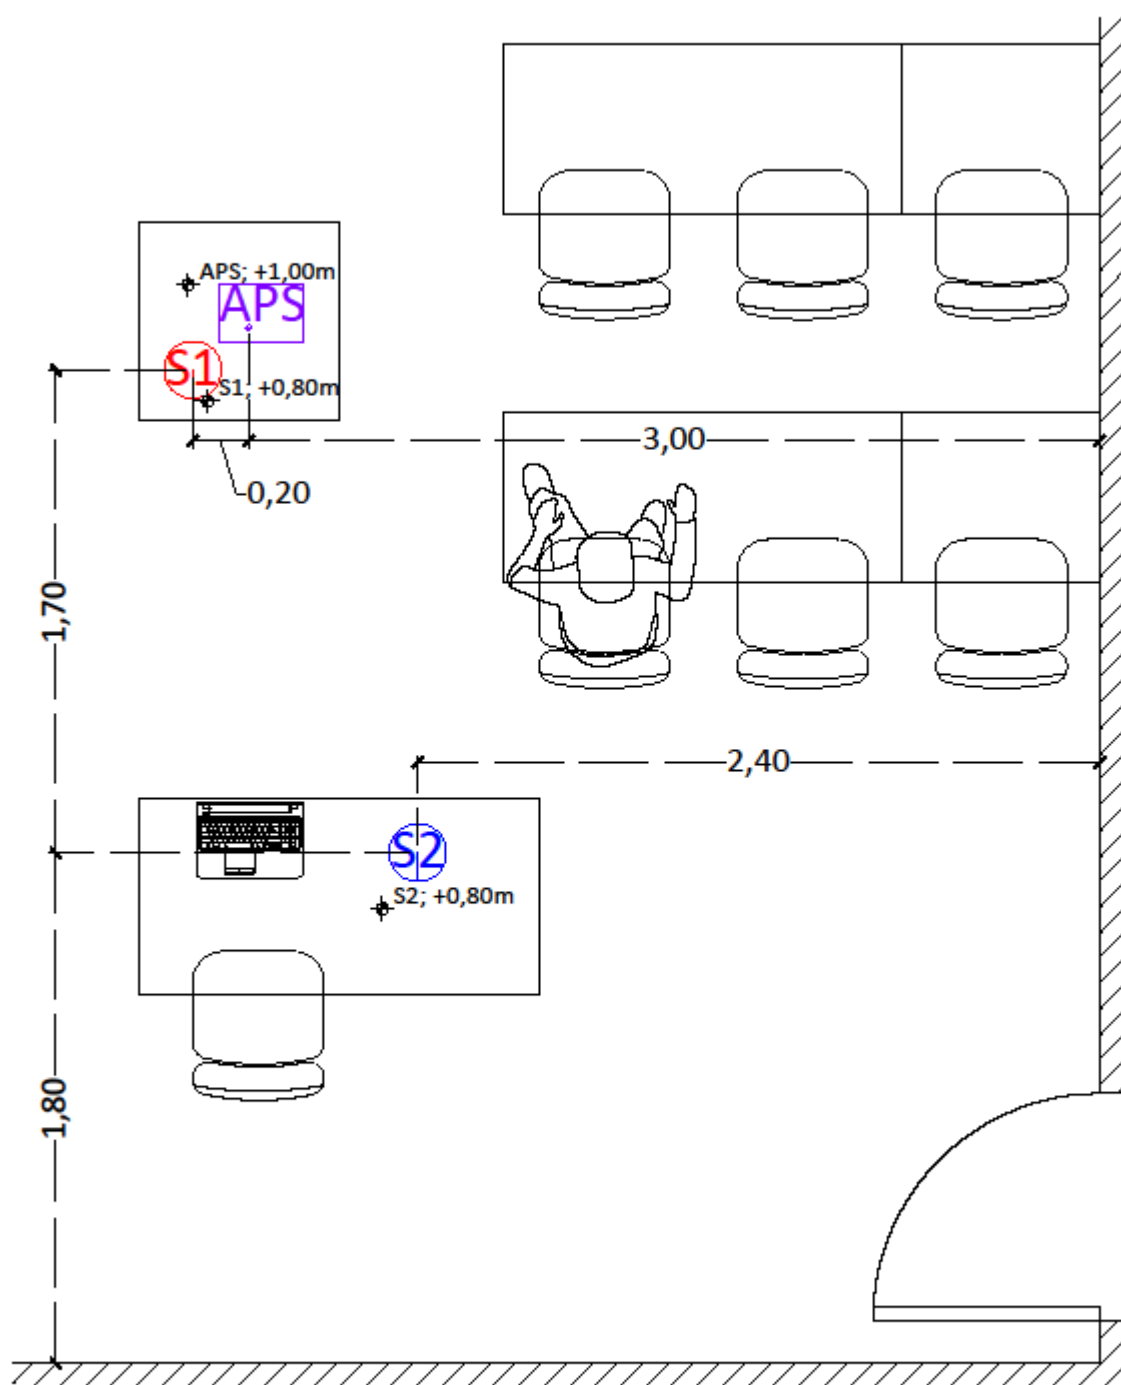

Figure S4. Detail view.

S1.3. Ignacio Aldecoa Library – Children area.

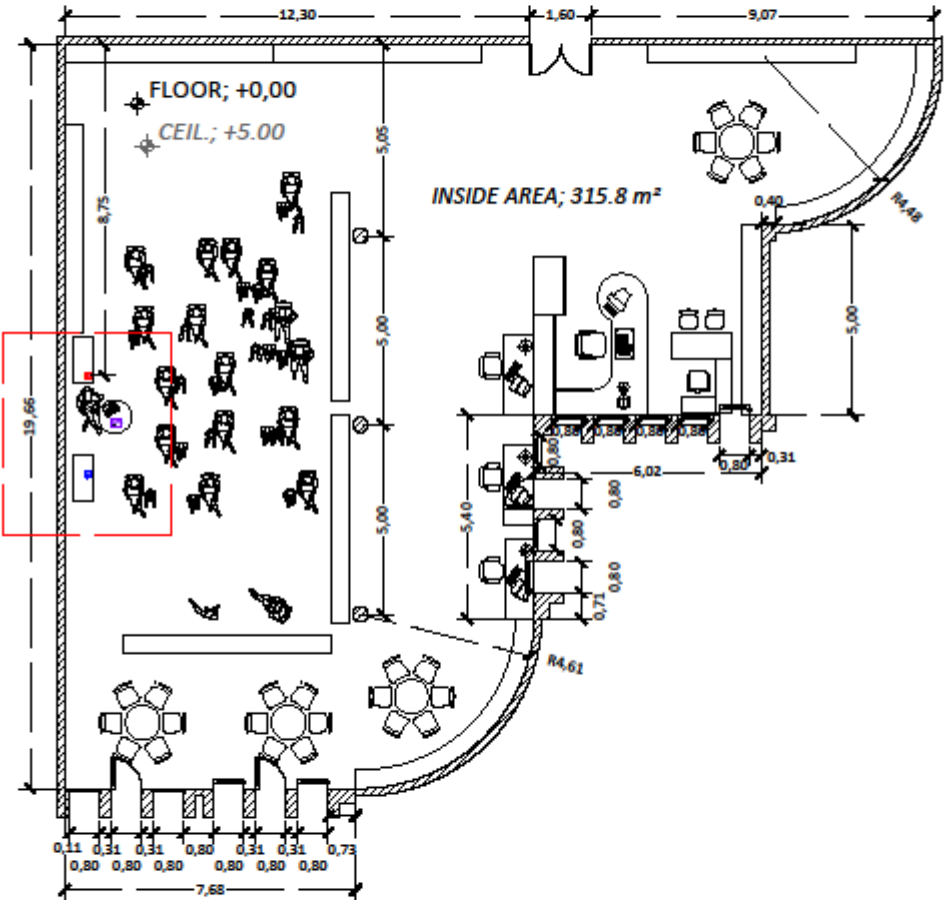

Figure S5. General view.

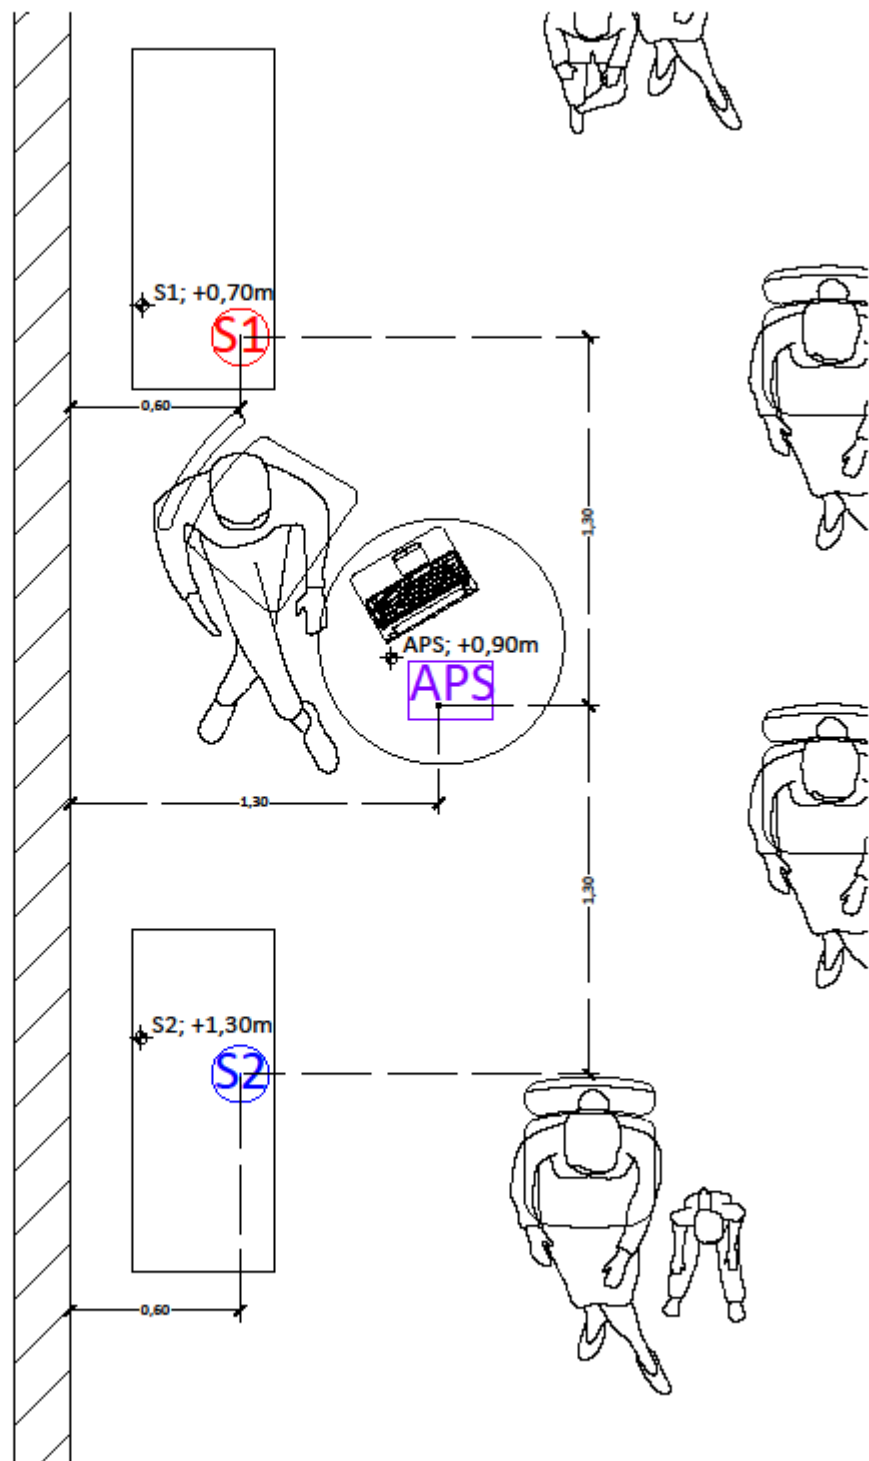

Figure S6. Detail view.

S1.4. Ignacio Aldecoa Library – Assembly Hall

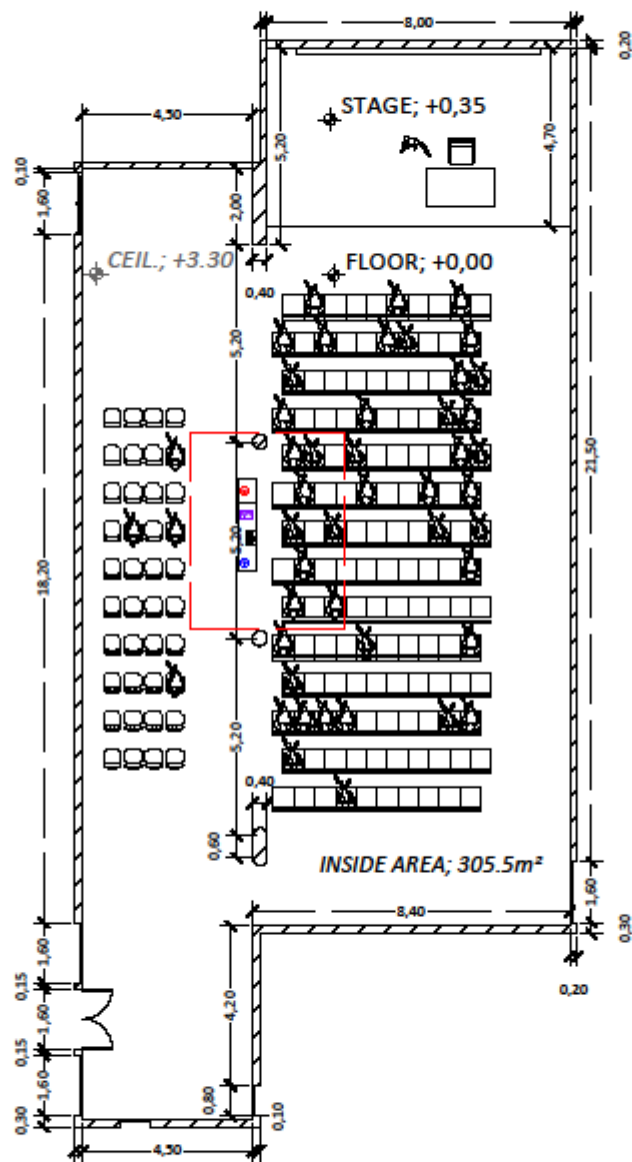

Figure S7. General view.

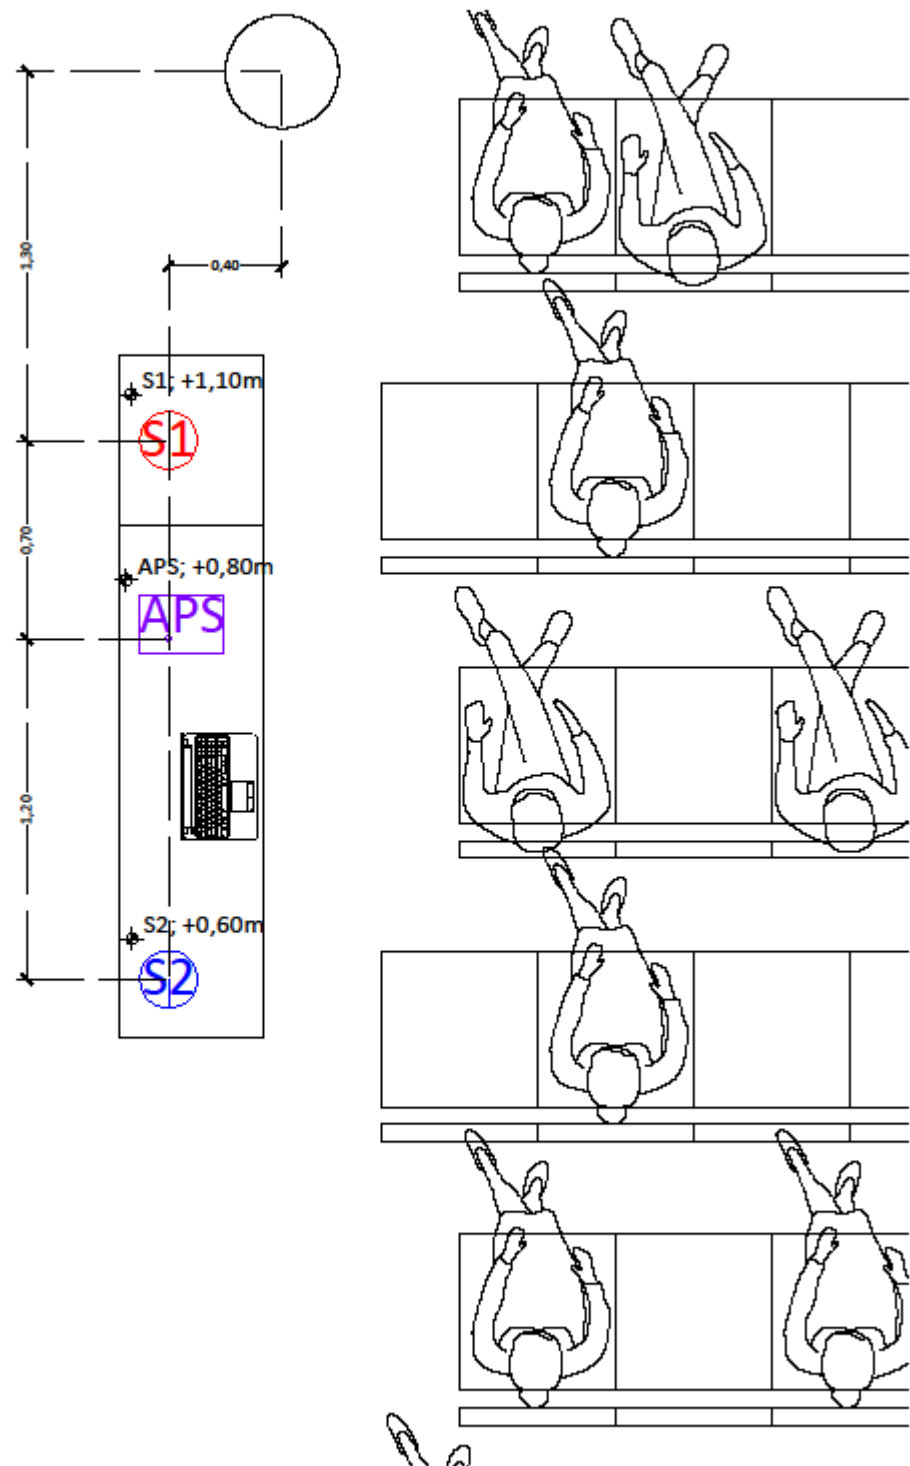

Figure S8. Detail view.

S1.5. Ignacio Aldecoa Library – Conference Room.

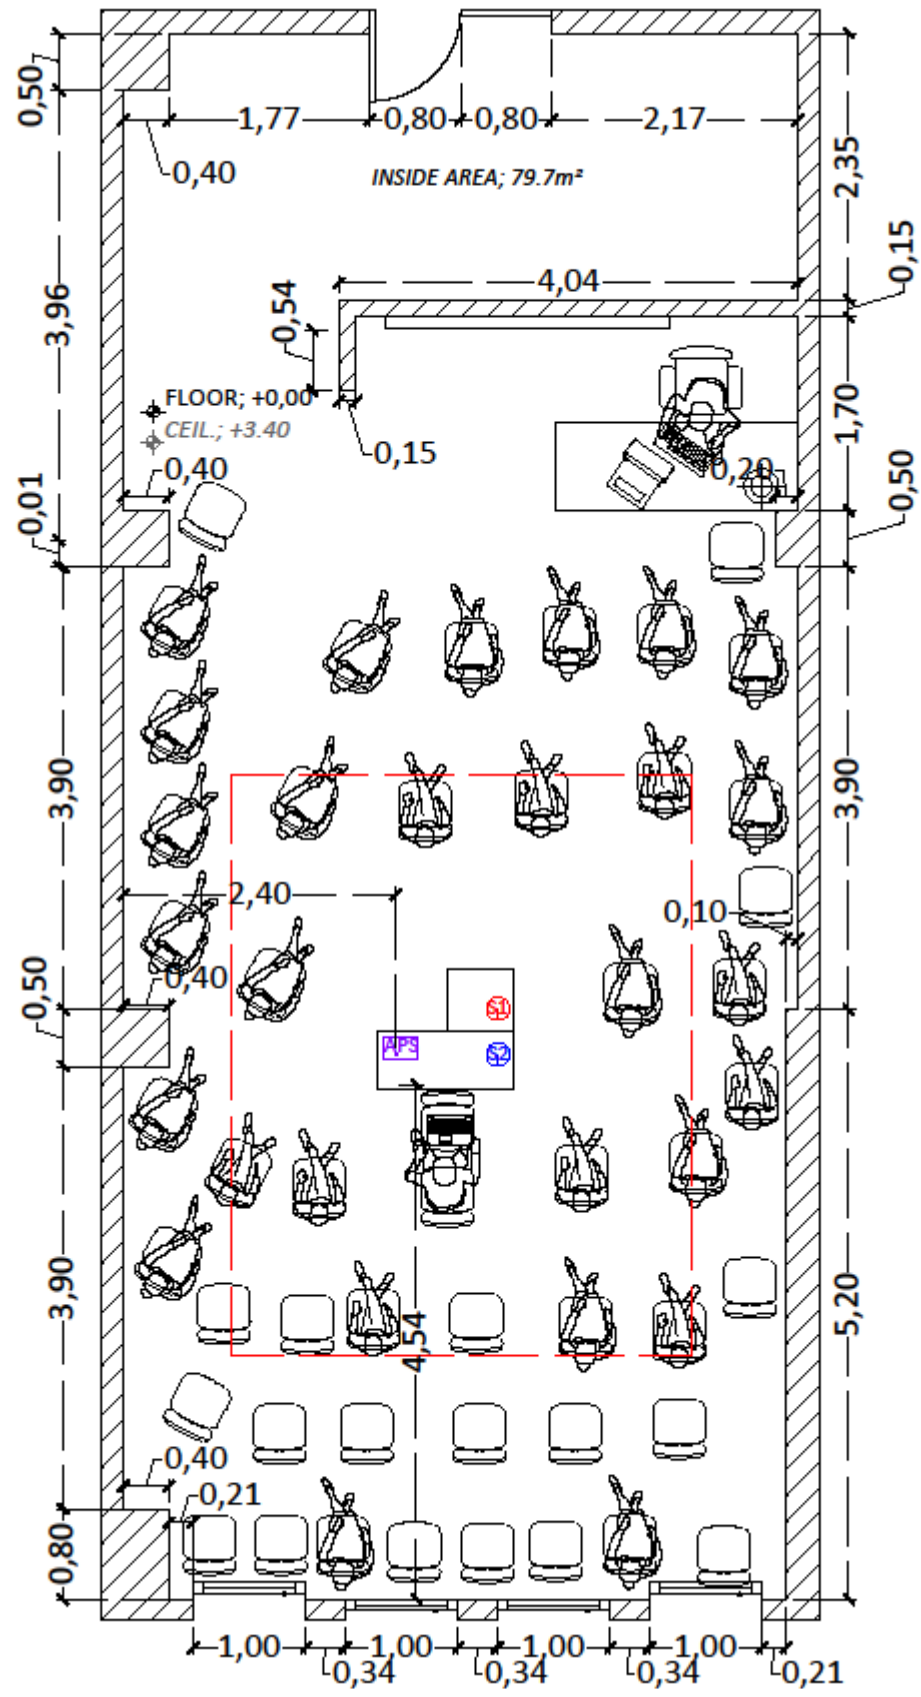

Figure S9. General view.

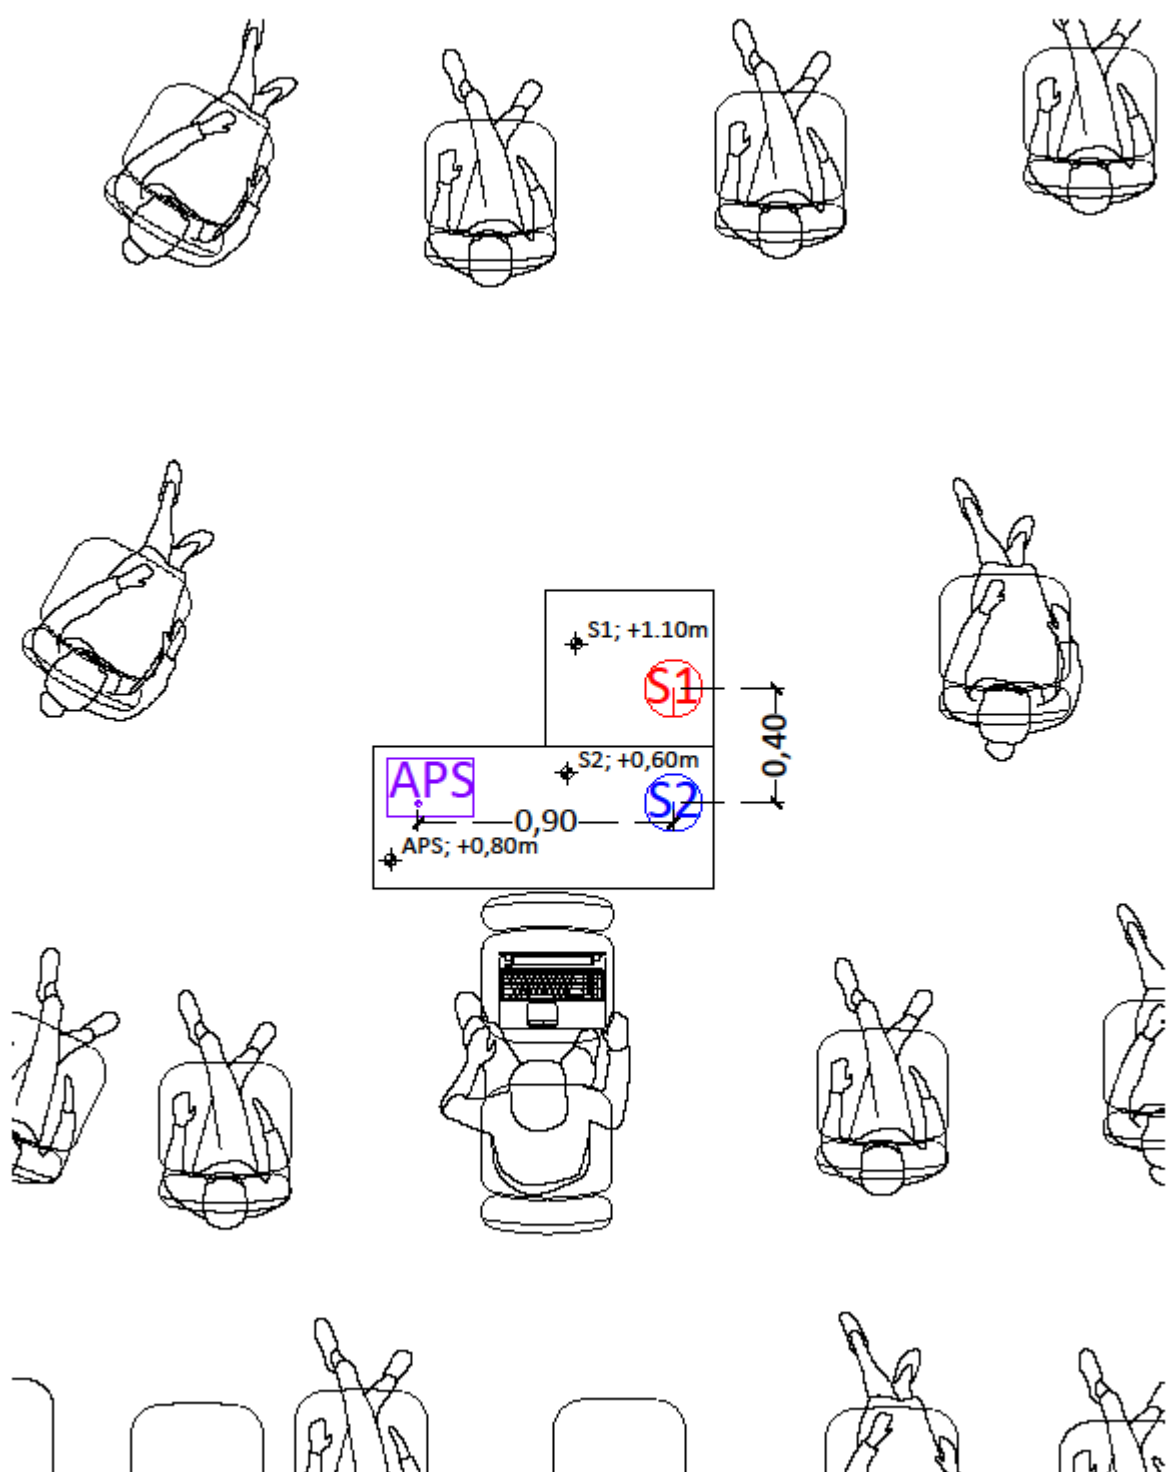

Figure S10. Detail view.

**Figure S11. General view.**

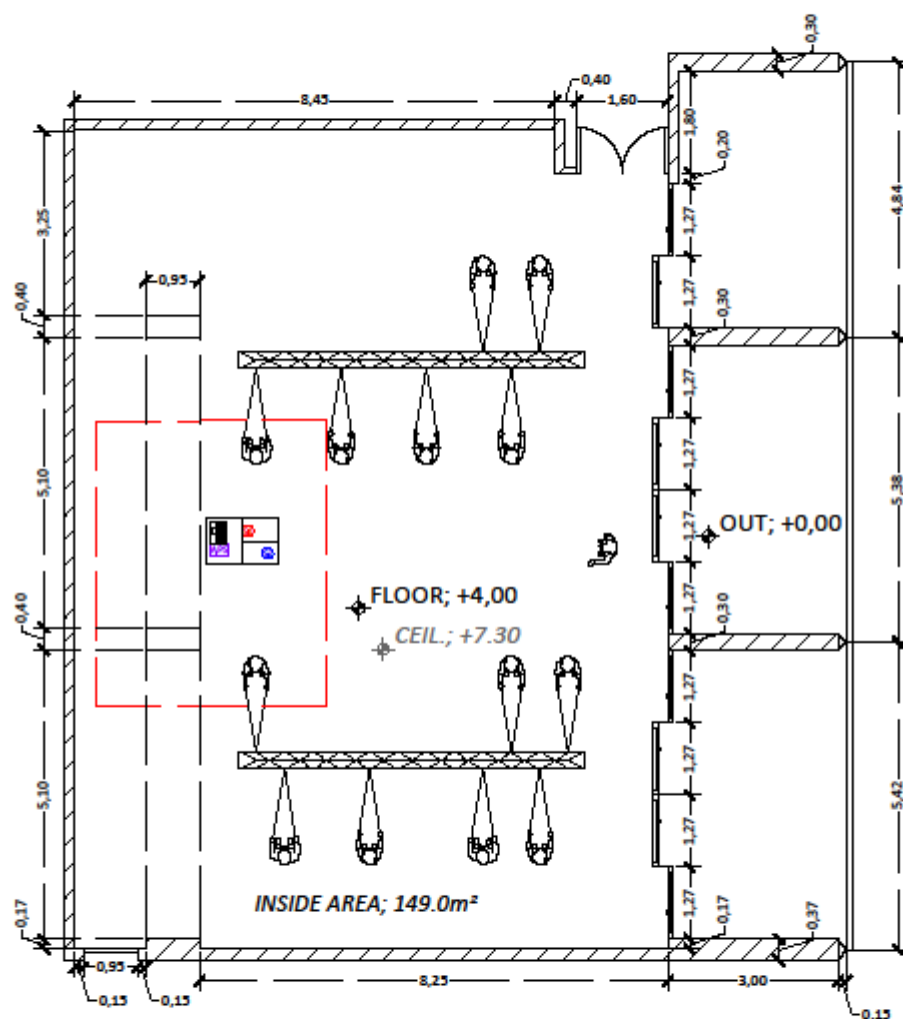

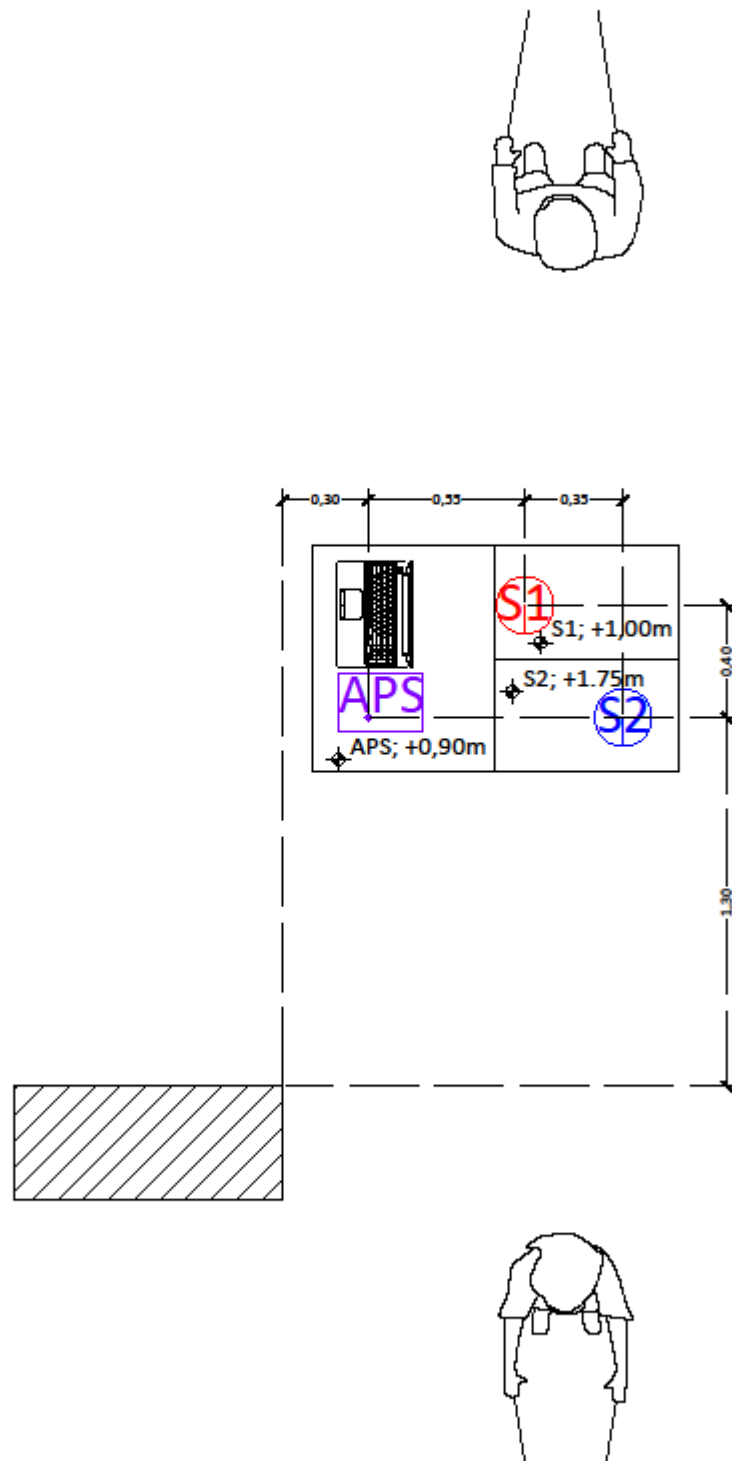

Figure S12. Detail view.

S1.7. Mendizorroza sports facilities – Spinning Room

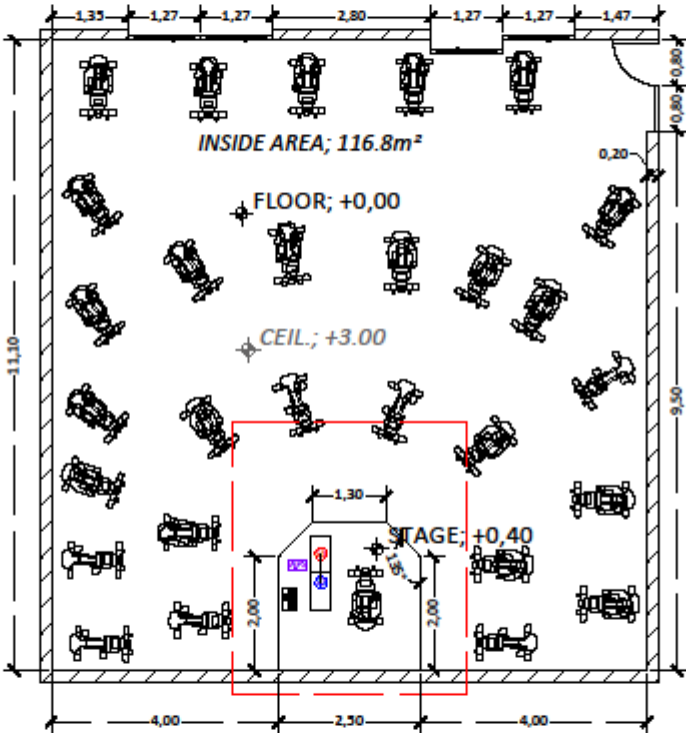

Figure S13. General view.

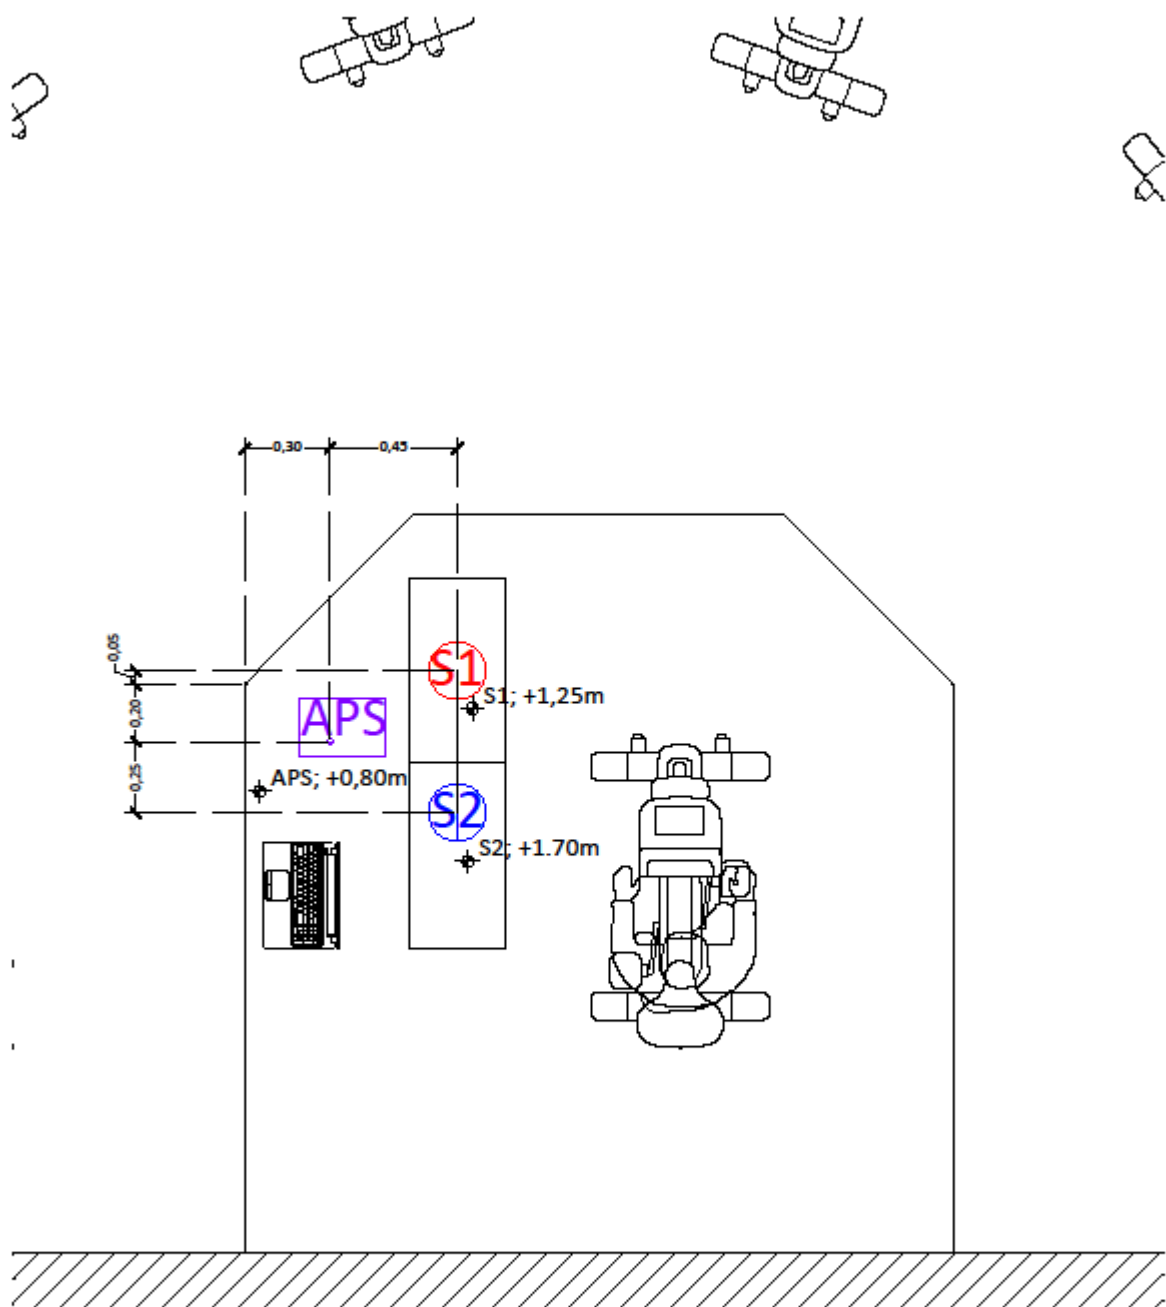

Figure S14. Detail view.

## Supplementary Materials S2. Rest of graphics

In the current Appendix Figure S15, Figure S16, Figure S17, Figure S18, Figure S19, Figure S20 and Figure S21, present cumulative particle mass concentration (CPM<sub>i</sub>) in percentage (%) for all sizes detected by the APS. In this figure four selected sizes are presented coloured, which correspond to  $i=0.723$ ,  $2.458$ ,  $5.048$  and  $10.370$ . Also PNC and PM<sub>20</sub> are plotted to explain other effect of interest. Also PM<sub>20</sub> and PNC curves are plotted along with them to assess for relationship and interactions between them.

In addition, outdoor environmental conditions are presented in case of further research to be done or to compare with any of ones included in this article and/or if further analysis wants to be performed on its basis.

### S2.1. University Classroom A206– Scenario 1: During class with students

Figure. B.1 1 presents all PM<sub>i</sub>, PNC and PM<sub>20</sub> inside the classroom. It should be mentioned that all the peaks and valleys in the PM<sub>i</sub> curves were detected by PM<sub>20</sub> curve. However, they were not so evidently identified. Eventually, by adding PNC curve on top of them it was seen there was neither direct relationship between PM<sub>i</sub> and PNC curves. However, relation between this data is addressed as it happened for the record and in order to resume the results in the timeline. As soon as measurement started, all windows and doors were closed. Valleys in both PNC and PM<sub>20</sub> had place while PM<sub>i</sub> of particles smaller or equal to  $2.458\mu\text{m}$  suffered a reduction wave and the ones in the range between  $2.458\mu\text{m}$  and  $7.234\mu\text{m}$  saw an increase wave. Then, one more alumni entered the room and windows were opened during following 16min. Peak in PNC and valley in PM<sub>20</sub> had place while PM<sub>i</sub> of particles smaller or equal to  $2.458\mu\text{m}$  saw an increase wave and the ones in the range between  $2.458\mu\text{m}$  and  $7.234\mu\text{m}$  suffered a reduction wave. After it, and once again, all was closed during 20min. Valley in PNC and peak in PM<sub>20</sub> had place while PM<sub>i</sub> of particles smaller or equal to  $2.458\mu\text{m}$  suffered a reduction wave and the ones in the range between  $2.458\mu\text{m}$  and  $7.234\mu\text{m}$  saw an increase wave. At this time, all windows and doors were opened. Peak in PNC and valley in PM<sub>20</sub> had place while PM<sub>i</sub> of particles smaller or equal to  $2.458\mu\text{m}$  saw an increase wave and the ones in the range between  $2.458\mu\text{m}$  and  $7.234\mu\text{m}$  suffered a reduction wave. Just before closing again, already mentioned alumni left the room. Again, during another 20min interval in all closed stage, valley in PNC and peak in PM<sub>20</sub> had place while PM<sub>i</sub> of particles smaller or equal to  $2.458\mu\text{m}$  suffered a reduction wave and the ones in the range between  $2.458\mu\text{m}$  and  $7.234\mu\text{m}$  saw an increase wave. After that interval finished, only doors were opened until the end of the class. During this 30min interval, valley in PM<sub>20</sub> and continuous increase wave in PNC had place while PM<sub>i</sub> of particles smaller or equal to  $2.458\mu\text{m}$  saw an increase wave and the ones in the range between  $2.458\mu\text{m}$  and  $7.234\mu\text{m}$  suffered a reduction wave. During the back to the calm stage performed, and for 25min after the class ended, measurement continued in an all closed stage with the room empty. In this interval, valley and decrease in PNC and valley with small increase in PM<sub>20</sub> had place while PM<sub>i</sub> of particles smaller or equal to  $3.278\mu\text{m}$  saw an increase wave and the ones in the range between  $3.278\mu\text{m}$  and  $7.234\mu\text{m}$  suffered a reduction wave.

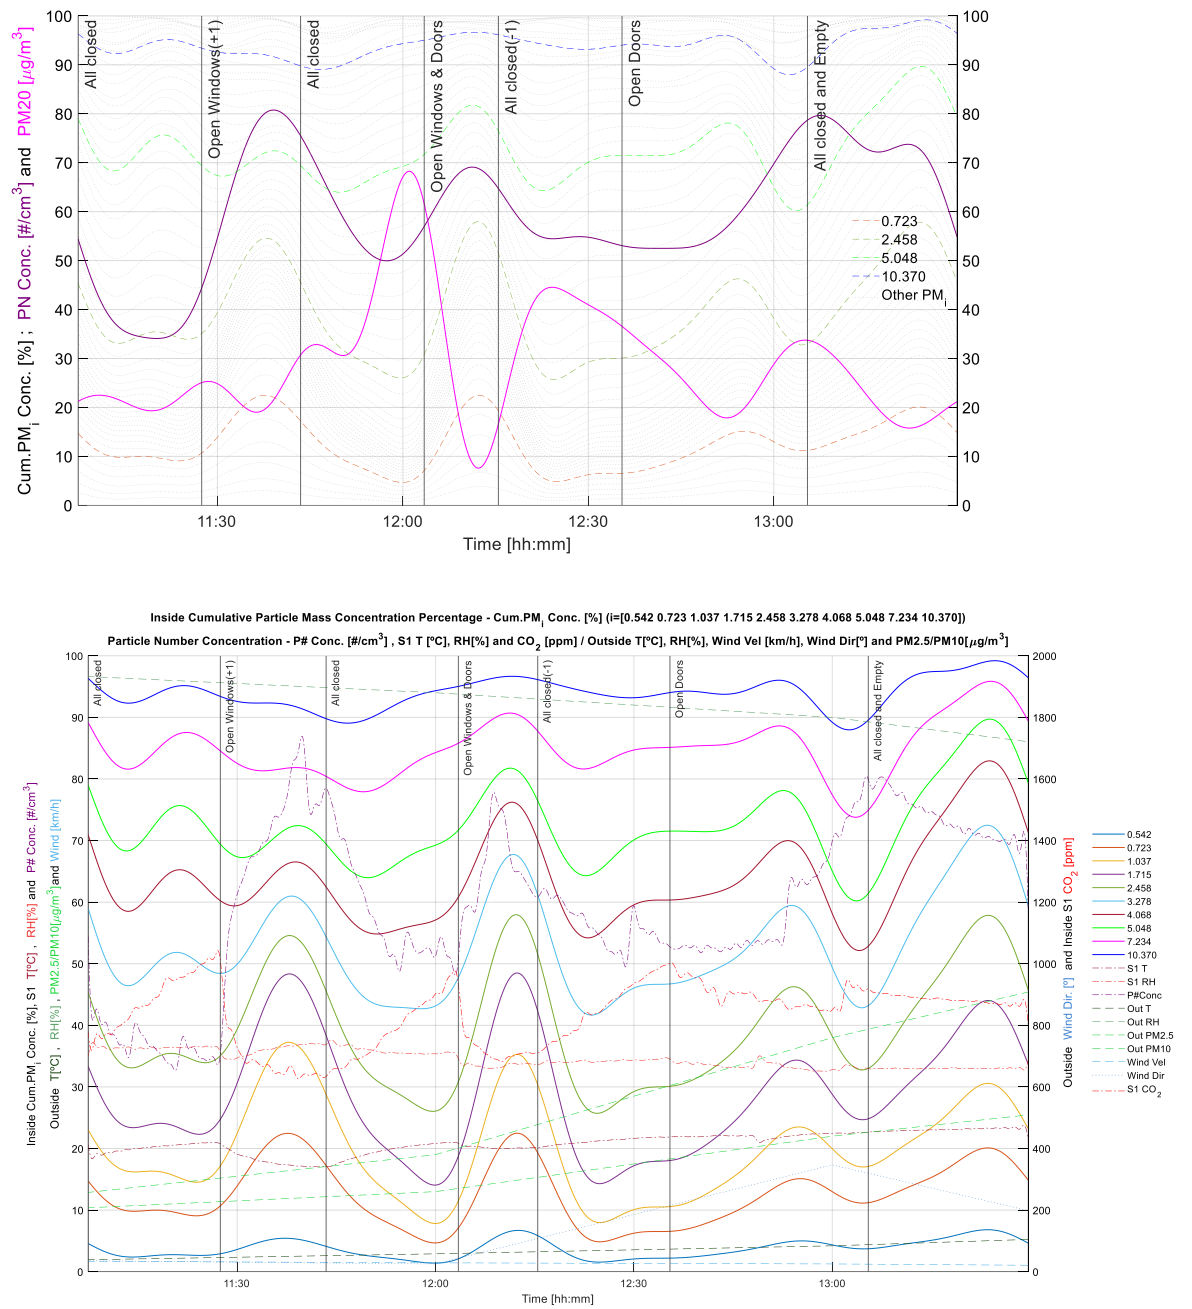

**Figure S15. Cum. PM<sub>i</sub> Conc. [%], PN Conc. [#/cm<sup>3</sup>] and PM<sub>20</sub> [μg/m<sup>3</sup>] including Outdoor environment conditions along with Outdoor PM Concentrations for PM<sub>2.5</sub> and PM<sub>10</sub>.**

## S2.2. University Classroom A206—Scenario 2: Empty class with one people partial stay.

Figure S16 presents all  $PM_i$ , PNC and  $PM_{20}$  inside the classroom. It should be mentioned that all the peaks and valleys in the  $PM_i$  curves were detected by  $PM_{20}$  curve. However, they were not so evidently identified. Eventually, by adding PNC curve on top of them it was seen there was neither direct relationship between  $PM_i$  and PNC curves. However, relation between this data is addressed as it happened for the record and in order to resume the results in the timeline. As soon as measurement started, all windows and doors were closed. Valley in PNC and peak in  $PM_{20}$  had place while  $PM_i$  of particles in the range  $0.542\mu m$  to  $1.715\mu m$  suffered a reduction wave and the ones in the range between  $1.715\mu m$  and  $4.068\mu m$  saw an increase wave. Then, one alumni entered the room and windows were opened during following 16min. Peak in PNC and valley in  $PM_{20}$  had place while  $PM_i$  of particles in the range  $0.542\mu m$  to  $1.715\mu m$  saw an increase wave and the ones in the range between  $1.715\mu m$  and  $4.068\mu m$  suffered a reduction wave. After it, and once again, all was closed during 20min. Valleys in both PNC and  $PM_{20}$  had place while  $PM_i$  of particles in the range  $0.542\mu m$  to  $1.715\mu m$  suffered a reduction and the ones in the range between  $1.715\mu m$  and  $4.068\mu m$  saw an increase. At this time, all windows and doors were opened. Peaks in both PNC and  $PM_{20}$  had place while  $PM_i$  of particles in the range  $0.542\mu m$  to  $1.715\mu m$  suffered a reduction wave and the ones in the range between  $1.715\mu m$  and  $4.068\mu m$  saw an increase wave. Just before closing again, the unique alumni left the room. Again, during another 20min interval in all closed stage, reduction in both PNC and  $PM_{20}$  had place, being the PNC one in a wavy way. At the same time,  $PM_i$  of particles in the range  $0.542\mu m$  to  $1.715\mu m$  saw two tiny increase waves and the ones in the range between  $1.715\mu m$  and  $4.068\mu m$  suffered two reduction waves. All of the oscillated in the same way than PNC curve did it. After that interval finished, only doors were opened until the end of the class. During this 30min interval, increase in  $PM_{20}$  and continuous increase in PNC had place while  $PM_i$  of particles in the range  $0.542\mu m$  to  $1.715\mu m$  saw an increase and the ones in the range between  $1.715\mu m$  and  $4.068\mu m$  suffered a reduction. During the back to the calm stage performed, and for 25min after the class ended, measurement continued in an all closed stage with the room empty. In this interval, valley and decrease in PNC and valley with small increase at the end in  $PM_{20}$  had place while  $PM_i$  of particles in the range  $0.542\mu m$  to  $1.715\mu m$  saw an increase wave and the ones in the range between  $1.715\mu m$  and  $4.068\mu m$  suffered a reduction wave.

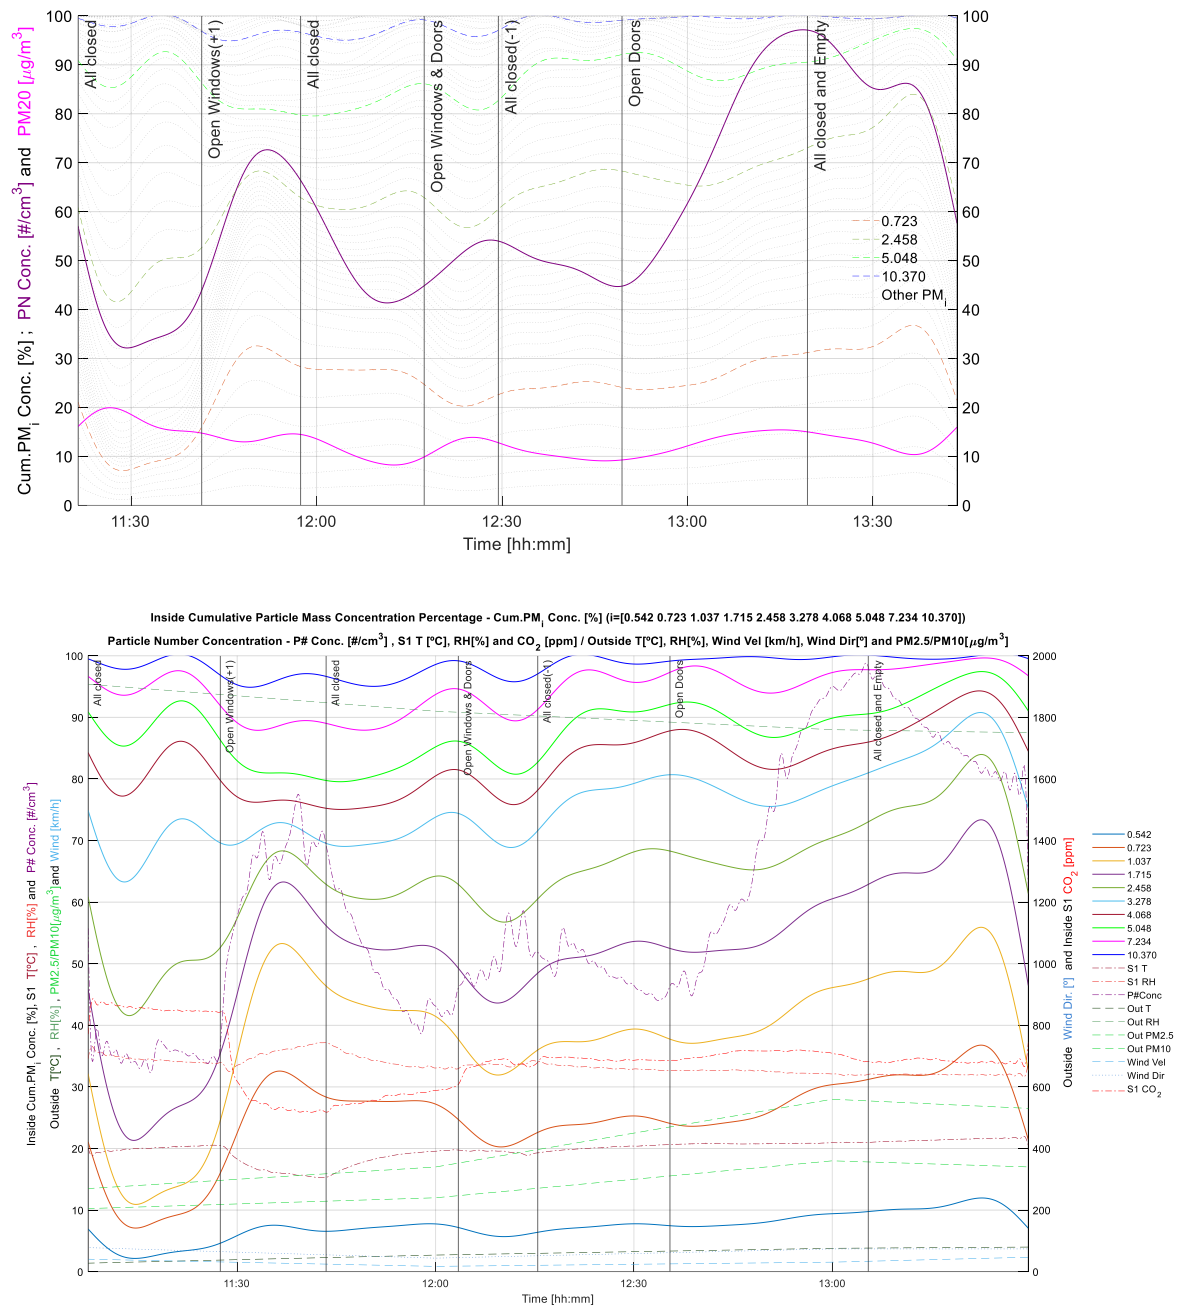

Figure S16. Cum. PM<sub>i</sub> Conc. [%], PN Conc. [#cm<sup>3</sup>] and PM<sub>20</sub> [μg/m<sup>3</sup>] including Outdoor environment conditions along with Outdoor PM Concentrations for PM<sub>2.5</sub> and PM<sub>10</sub>.

### S2.3. Ignacio Aldecoa Library – Children area.

Figure S17 presents all  $PM_i$ , PNC and  $PM_{20}$  inside the children area. It should be mentioned that all the peaks and valleys in the  $PM_i$  curves were detected by  $PM_{20}$  curve. However, they were not so evidently identified. Eventually, by adding PNC curve on top of them it was seen there was neither direct relationship between  $PM_i$  and PNC curves. However, relation between this data is addressed as it happened for the record and in order to resume the results in the timeline. Once measurement started, only one of the doors was maintained opened keeping the other one closed for the rest of the time until the end of the measurement. At this time, with seven windows partially opened, valley in PNC and peak in  $PM_{20}$  had place while  $PM_i$  of particles smaller than  $7.234\mu m$  suffered a reduction wave and the ones above  $7.234\mu m$  saw an increase wave. At this time, parents and children started entering the room and sitting in the floor during 14min. Valley in PNC and constant increase in  $PM_{20}$  had place while  $PM_i$  of particles smaller than  $5.048\mu m$  suffered a reduction wave and the ones above  $5.048\mu m$  saw an increase wave. Then, show started and 7min after three of the partially opened windows were fully opened for another 10min, during these intervals valley in PNC and constant increase in  $PM_{20}$  had place while  $PM_i$  of particles smaller than  $5.048\mu m$  suffered a reduction wave and the ones above  $5.048\mu m$  saw an increase wave. Again, at this moment those three windows were closed during 23min interval. Decrease in PNC and valley and peak in  $PM_{20}$  had place while  $PM_i$  of particles smaller than  $5.048\mu m$  suffered two reduction waves and the ones above  $5.048\mu m$  saw two increase waves. When this interval finished, those three windows were opened again until the end of the show, also people started singing, mostly for the last 6min of the show. Constant increase in PNC and valley and peak in  $PM_{20}$  had place while  $PM_i$  of particles smaller than  $5.048\mu m$  suffered a reduction wave and the ones above  $5.048\mu m$  suffered a reduction wave at the first part of this interval and at the last part saw an increase wave. In order to finish the measurement, a back to the calm stage was performed, and for 23min after the show was ended measurement continued as it was, regarding ventilation. In this interval, in which people left for the first minutes, constant increase and a decrease at the end in PNC and a decrease with a valley and a peak in the middle in  $PM_{20}$  had place while  $PM_i$  of particles smaller than  $7.234\mu m$  presented first an increase wave and then a reduction while the ones above  $7.234\mu m$  presented the opposite.

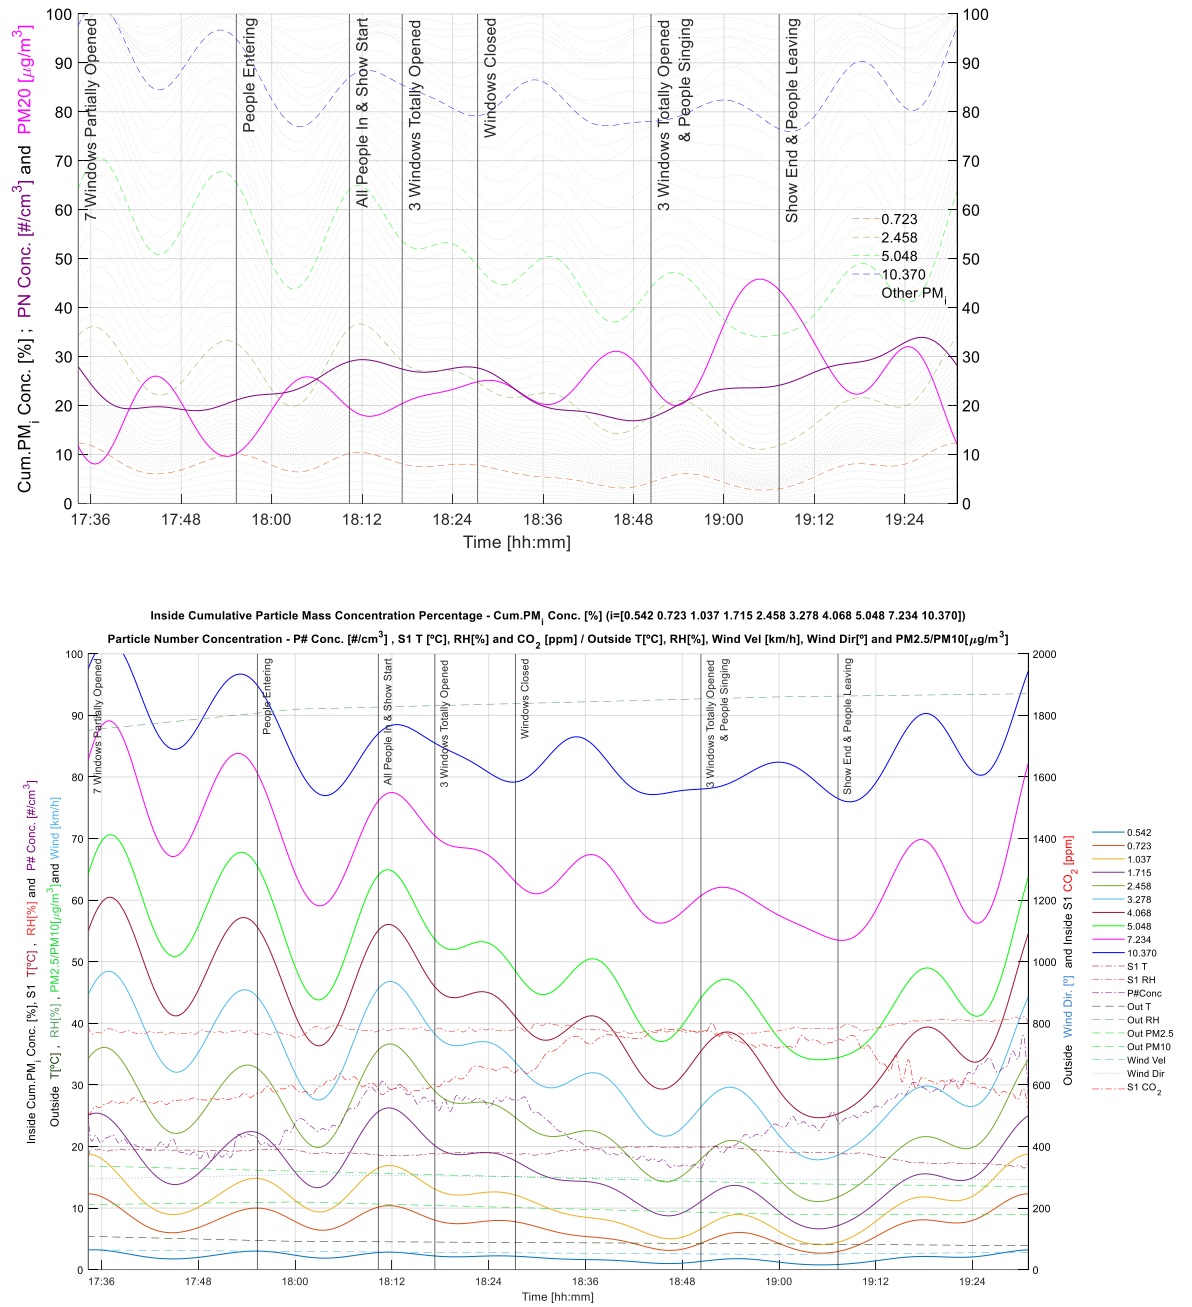

**Figure S17. Cum. PM<sub>i</sub> Conc. [%], PN Conc. [#/cm<sup>3</sup>] and PM<sub>20</sub> [μg/m<sup>3</sup>] including Outdoor environment conditions along with Outdoor PM Concentrations for PM<sub>2.5</sub> and PM<sub>10</sub>.**

## S2.4. Ignacio Aldecoa Library – Assembly Hall.

Figure S18 presents all  $PM_i$ , PNC and  $PM_{20}$  inside the assembly hall. It should be mentioned that all the peaks and valleys in the  $PM_i$  curves were detected by  $PM_{20}$  curve. However, they were not so evidently identified. Eventually, by adding PNC curve on top of them it was seen there was neither direct relationship between  $PM_i$  and PNC curves. However, relation between this data is addressed as it happened for the record and in order to resume the results in the timeline. Once measurement started, in 9min peaks in both PNC and  $PM_{20}$  had place while  $PM_i$  of smaller than  $5.048\mu m$  suffered a reduction wave and the ones above  $5.048\mu m$  saw an increase wave. At this time, 11 more people had entered the area. Conference started and door was closed at the same time. During the following 23min constant decrease in both PNC and  $PM_{20}$  had place while  $PM_i$  of particles smaller than  $5.048\mu m$  saw an increase wave and the ones above  $5.048\mu m$  suffered a reduction wave. Then, 5 more people entered and during the following 1hour and 5min conference continued stable in ventilation and people inside the area where constant decrease in PNC and stabilization of  $PM_{20}$  had place while  $PM_i$  of particles opposite behaviour is more notable presented by comparing curves for particles in the range of  $7.234\mu m$  to  $10.370\mu m$  versus the range of range of  $7.234\mu m$  to  $10.370\mu m$ . Again, while one curve saw an increase wave the other one suffered a reduction wave. At this time, 5 people left, and after 15min both PNC and  $PM_{20}$  went slightly up and then back to their previous values. Then, again, 4 more people left, and after 8min PNC maintained stable and  $PM_{20}$  started going up.  $PM_i$  of particles smaller than  $5.048\mu m$  suffered a reduction wave and the ones above  $5.048\mu m$  saw an increase wave for the first 14 min, and the opposite occurred for the following 8min until the end of the stage. In order to finish the measurement, a back to the calm stage was performed, and for 20min after conference ended measurement continued as it was, regarding ventilation. In this interval, in which people left in a few minutes, increases in both PNC and  $PM_{20}$  had place while  $PM_i$  of particles smaller than  $5.048\mu m$  suffered a reduction wave and the ones above  $5.048\mu m$  saw an increase wave at the first minutes and the opposite occurred at the end of the measurement part.

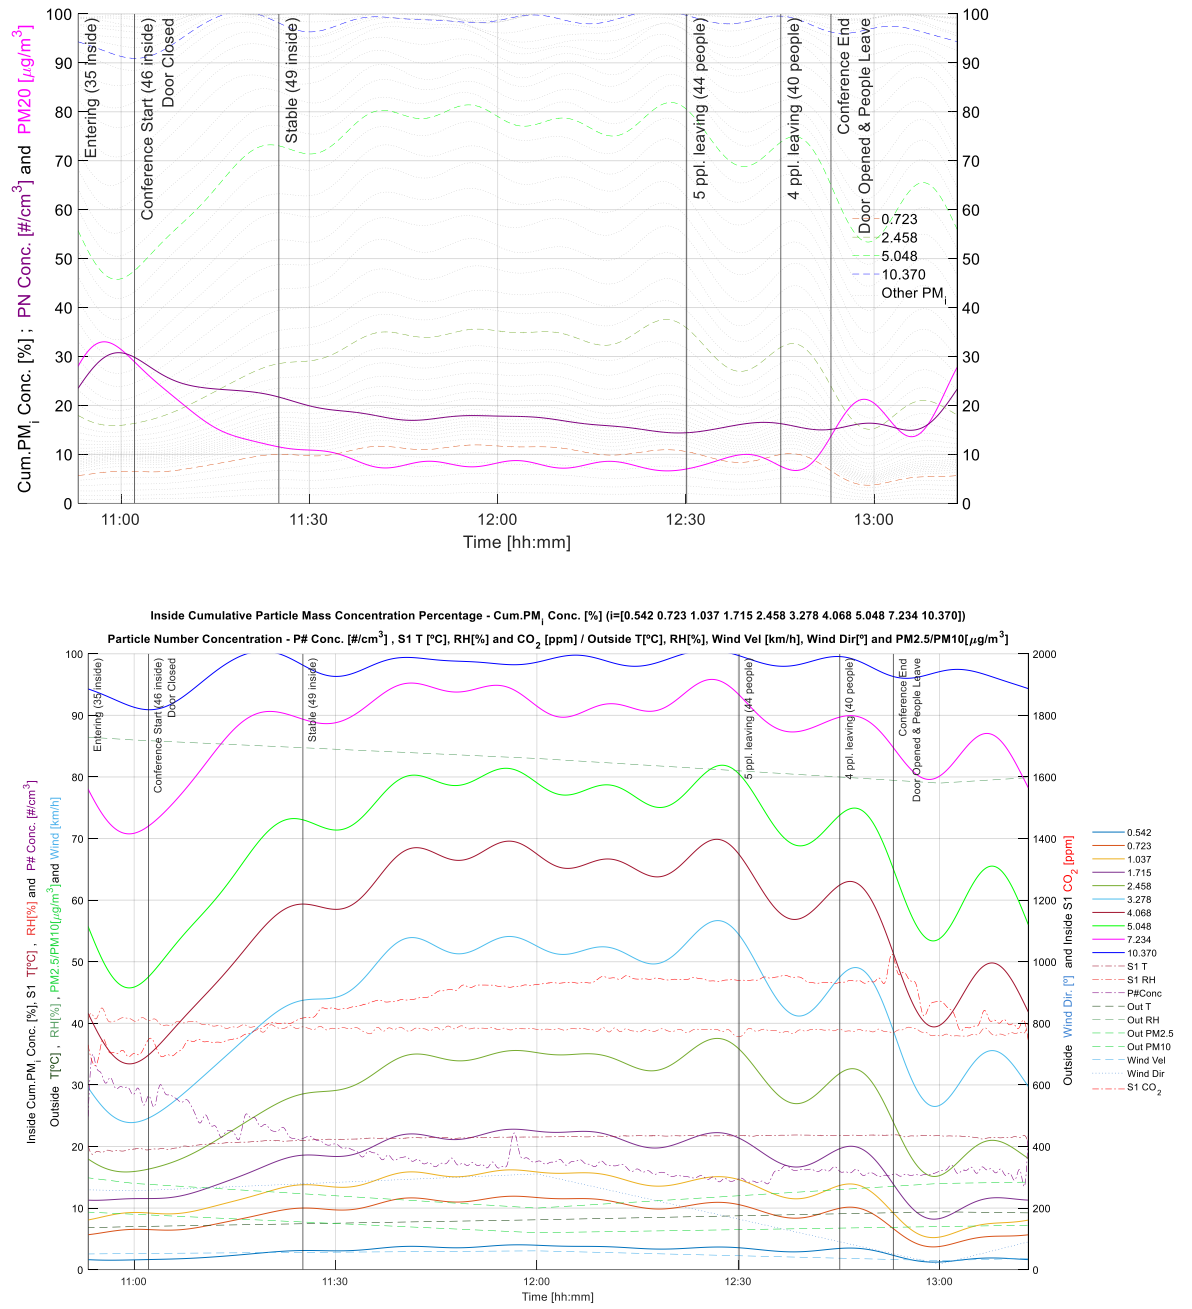

**Figure S18. Cum. PM<sub>i</sub> Conc. [%], PN Conc. [#/cm<sup>3</sup>] and PM<sub>20</sub> [µg/m<sup>3</sup>] including Outdoor environment conditions along with Outdoor PM Concentrations for PM<sub>2.5</sub> and PM<sub>10</sub>.**

## S2.5. Ignacio Aldecoa Library – Conference Room.

Figure S19 presents all  $PM_{10}$ , PNC and  $PM_{20}$  inside the conference room. It should be mentioned that all the peaks and valleys in the  $PM_{10}$  curves were detected by  $PM_{20}$  curve. However, they were not so evidently identified. Eventually, by adding PNC curve on top of them it was seen there was neither direct relationship between  $PM_{10}$  and PNC curves. However, relation between this data is addressed as it happened for the record and in order to resume the results in the timeline. Once measurement started, door was closed for 4min. At this time, 4 more people entered the area in 4min, at this moment valley in PNC had place while  $PM_{20}$  presented an increase. Opposite behaviour of  $PM_{10}$  curves was not evident at this point. Then, 2 more people entered and 4min after two windows were partially opened. At this moment, both PNC and  $PM_{20}$  presented a constant increase, while still opposite behaviour of  $PM_{10}$  curves was not evident. At this moment, 10 more people entered the area and in another 10min peaks in both PNC and  $PM_{20}$  had place while  $PM_{10}$  of particles smaller than  $5.048\mu m$  suffered a reduction wave and the ones above  $5.048\mu m$  saw an increase wave. Then, 15 more people entered and conference started. For the following 1hour and 25min conference continued stable in terms of ventilation and people inside the area. During it, valleys in PNC and  $PM_{20}$  had place while opposite behaviour of  $PM_{10}$  curves is more evident by comparing the range between  $2.458\mu m$  and  $3.278\mu m$  versus the range between  $5.048\mu m$  and  $7.234\mu m$ . In order to finish the measurement, a back to the calm stage was performed, and for 26min after conference ended and people left measurement continued as it was, regarding ventilation. In this interval, in which people left in a few minutes,  $PM_{20}$  presented both peak and then valley while PNC presented a peak while again opposite behaviour of  $PM_{10}$  curves was not evident.



## S2.6. Mendizorroza sports facilities – Training Room.

Figure S20 presents all  $PM_i$ , PNC and  $PM_{20}$  inside the training room. It should be mentioned that all the peaks and valleys in the  $PM_i$  curves were detected by  $PM_{20}$  curve. However, they were not so evidently identified. Eventually, by adding PNC curve on top of them it was seen there was neither direct relationship between  $PM_i$  and PNC curves. However, relation between this data is addressed as it happened for the record and in order to resume the results in the timeline. As commented before, PNC maintained during the whole measurement within a stable level and without notable variation. Once measurement started, door kept opening and closing each time people entered the room, and  $PM_{20}$  presented a constant increase while  $PM_i$  of particles smaller than  $4.068\mu m$  saw a couple of increase waves and the ones above  $4.068\mu m$  suffered a pair of reduction waves. At this time, training class started, and for the following 60min room continued stable in terms of ventilation and number of people inside the area.  $PM_{20}$  presented three valleys with their correspondent peaks while  $PM_i$  of particles smaller than  $4.068\mu m$  saw three increase waves and the ones above  $4.068\mu m$  suffered three reduction waves. At this moment class ended, door was opened and people left, for the following 15min  $PM_{20}$  presented a constant decrease while  $PM_i$  of particles smaller than  $4.068\mu m$  suffered a reduction wave and the ones above  $4.068\mu m$  saw an increase wave. In order to finish the measurement, a back to the calm stage was performed, and for 15min door was closed and again  $PM_{20}$  presented a constant decrease while  $PM_i$  of particles smaller than  $4.068\mu m$  suffered a reduction wave and the ones above  $4.068\mu m$  saw an increase wave.

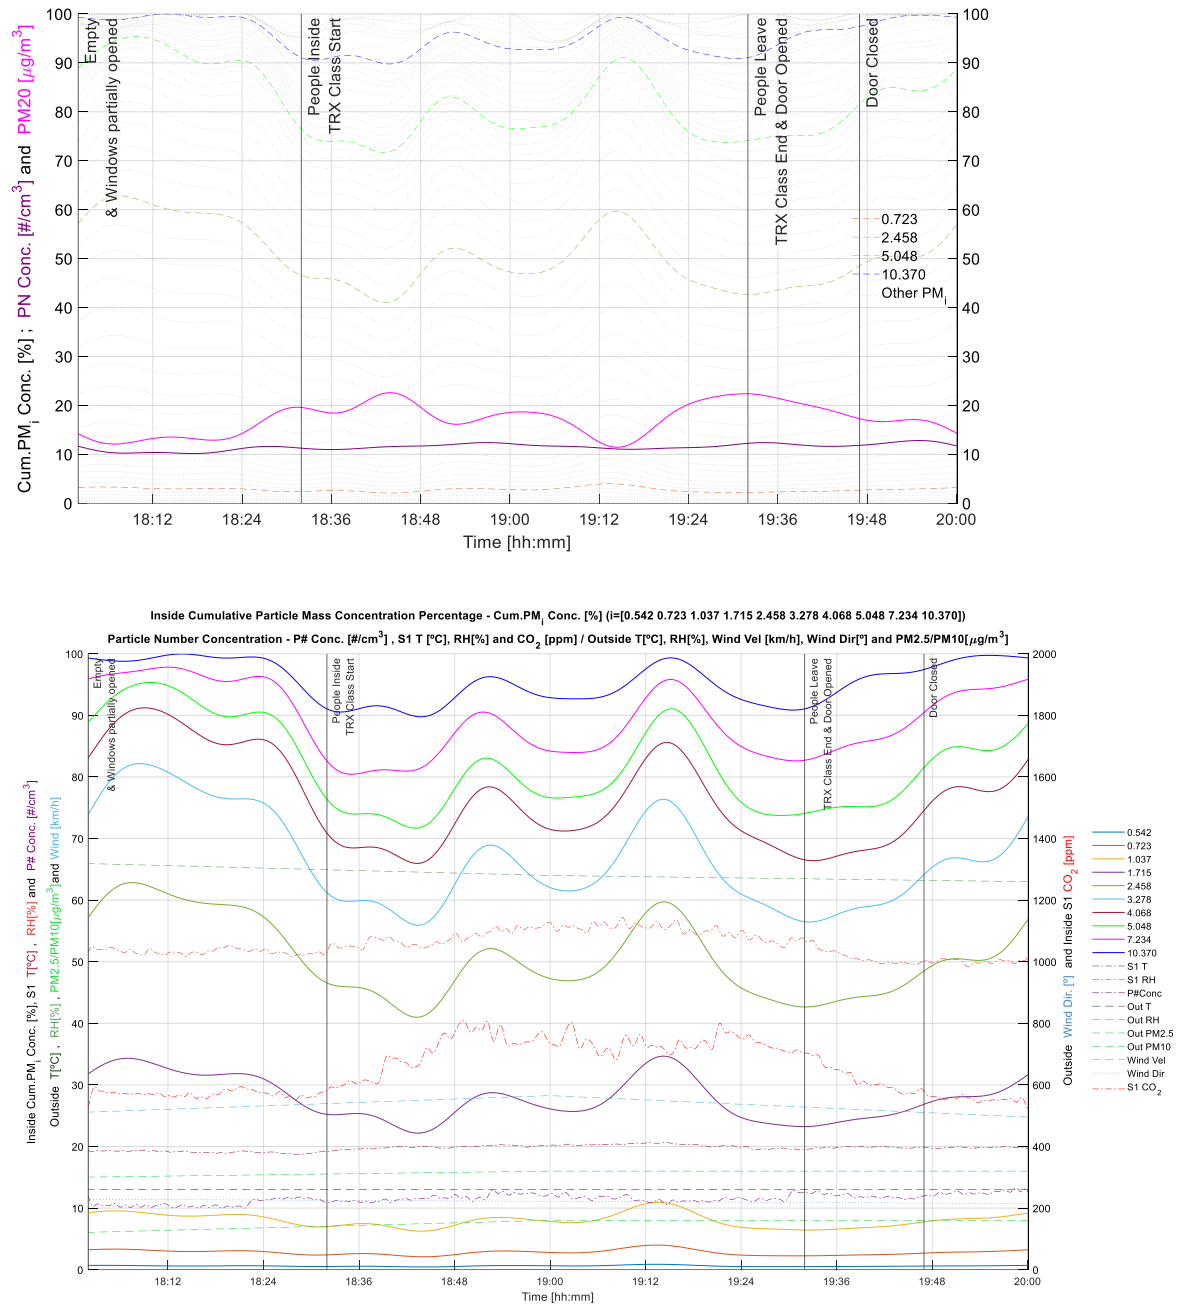

**Figure S20. Cum. PM<sub>i</sub> Conc. [%], PN Conc. [# / cm<sup>3</sup>] and PM<sub>20</sub> [µg / m<sup>3</sup>] including Outdoor environment conditions along with Outdoor PM Concentrations for PM<sub>2.5</sub> and PM<sub>10</sub>.**

## S2.7. Mendizorroza sports facilities – Spinning Room.

Figure S21 presents all  $PM_i$ , PNC and  $PM_{20}$  inside the spinning room. It should be mentioned that all the peaks and valleys in the  $PM_i$  curves were detected by  $PM_{20}$  curve. However, they were not so evidently identified. Eventually, by adding PNC curve on top of them it was seen there was neither direct relationship between  $PM_i$  and PNC curves. However, relation between this data is addressed as it happened for the record and in order to resume the results in the timeline. PNC and  $PM_{20}$  maintained without notable variation until the class was ended. Once measurement started, door kept opening and closing each time people entered the room, and  $PM_{20}$  presented a constant increase while  $PM_i$  of particles smaller than  $2.458\mu m$  saw a couple of increase waves and the ones above  $2.458\mu m$  suffered a pair of reduction waves. At this time, training class started, and for the following 60min room continued stable in terms of ventilation and number of people inside the area.  $PM_{20}$  presented three valleys with their correspondent peaks while  $PM_i$  of particles smaller than  $2.458\mu m$  saw three increase waves and the ones above  $2.458\mu m$  suffered three reduction waves. Once measurement started, people gradually entered the room until the class started. After a starting reduction both  $PM_{20}$  and PNC presented a slight and constant increase while  $PM_i$  of particles smaller than  $2.458\mu m$  suffered a pair of reduction waves and the ones above  $2.458\mu m$  saw a couple of increase waves. At this time, training class started, and for the following 41min room continued stable in terms of ventilation and number of people inside the area. However, 18min after window was partially opened. During this period both  $PM_{20}$  and PNC presented an increase while just at the end of the interval  $PM_i$  of particles smaller than  $2.458\mu m$  suffered the start of a reduction wave and the ones above  $2.458\mu m$  saw the start of an increase wave. At this moment class ended and stretching had place for the following 13min,  $PM_{20}$  and PNC presented a peak while  $PM_i$  of particles smaller than  $2.458\mu m$  suffered a reduction wave and the ones above  $2.458\mu m$  saw an increase wave. In order to finish the measurement, a back to the calm stage was performed, and in 35min  $PM_{20}$  and PNC presented a decrease while  $PM_i$  of particles smaller than  $2.458\mu m$  presented a reduction tendency and the ones above  $2.458\mu m$  presented an increase tendency.

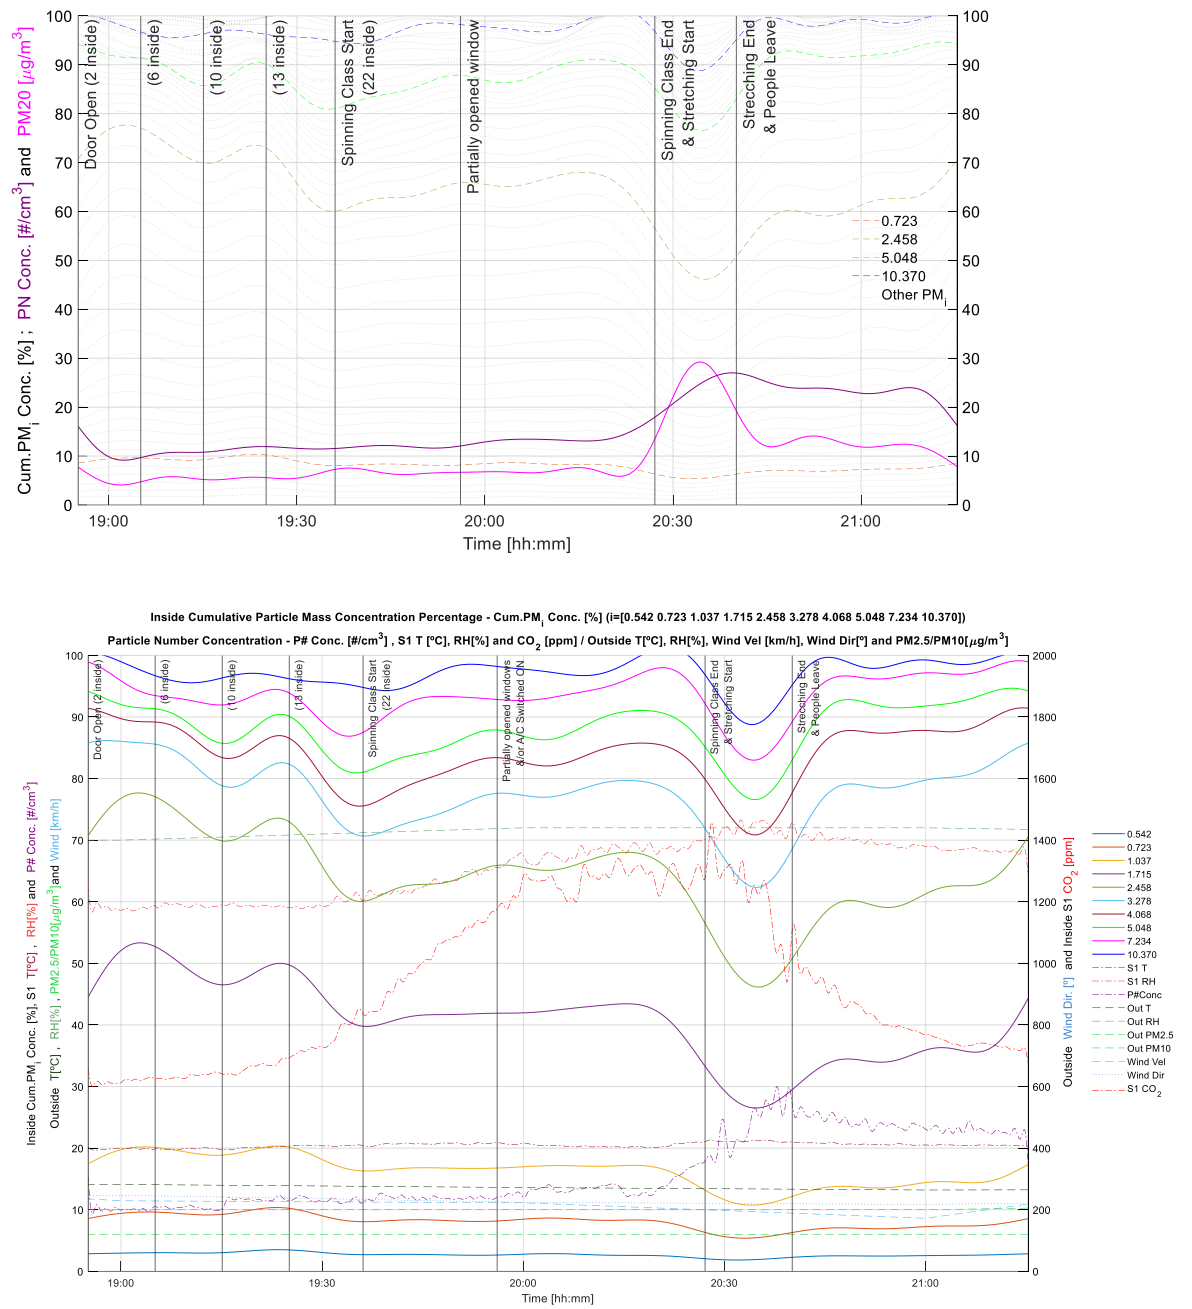

**Figure S21. Cum. PM<sub>i</sub> Conc. [%], PN Conc. [# / cm<sup>3</sup>] and PM<sub>20</sub> [μg / m<sup>3</sup>] including Outdoor environment conditions along with Outdoor PM Concentrations for PM<sub>2.5</sub> and PM<sub>10</sub>.**
